# Supplementary material for: Thermally conductive and electrically insulating epoxy nanocomposites with silica-coated graphene
Source: Royal Society of Chemistry journal article supplement (doi:10.1039/c4ra00518j), 2014-01-01
Supplement: c4ra00518j1.pdf [file c4ra00518j1.pdf]

## Supporting Information

### Thermally conductive and electrically insulating epoxy nanocomposites with silica-coated graphene

Xue Pu,<sup>a</sup> Hao-Bin Zhang,<sup>a</sup> Xiaofeng Li,<sup>\*a</sup> Chenxi Gui,<sup>a</sup> Zhong-Zhen Yu<sup>\*a,b</sup>

<sup>a</sup> State Key Laboratory of Organic-Inorganic Composites, Beijing University of Chemical Technology, Beijing 100029, China

<sup>b</sup> Beijing Key Laboratory on Preparation and Processing of Novel Polymer Materials, Beijing University of Chemical Technology, Beijing 100029, China

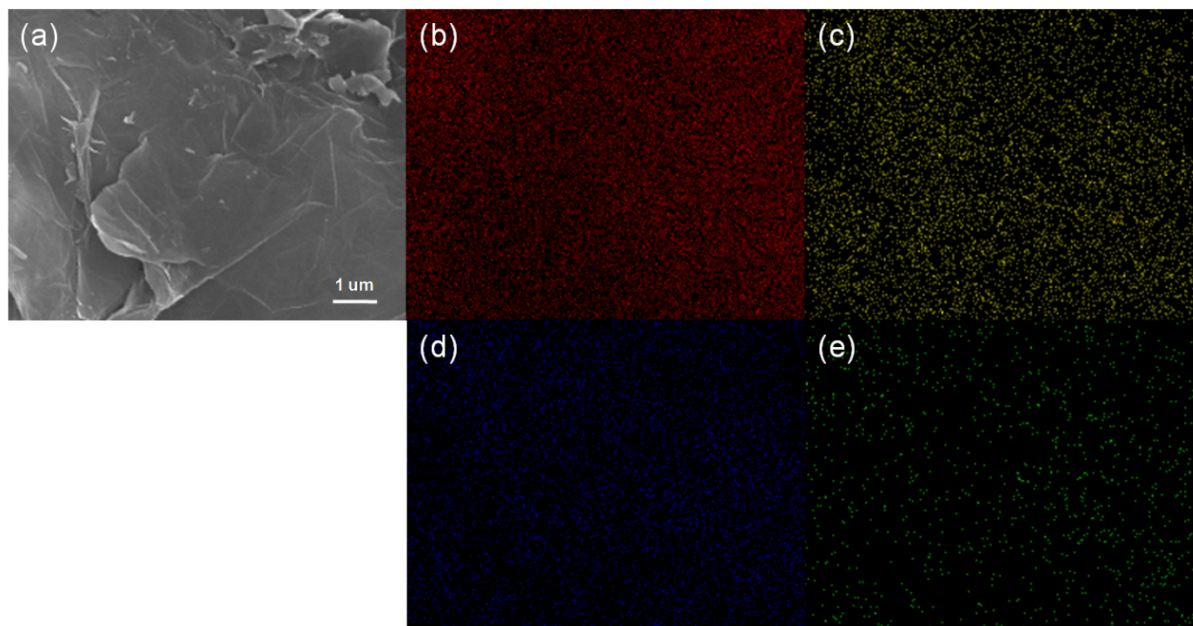

**Fig. S1** (a) SEM image of A-graphene and its corresponding elemental mapping images of (b) carbon, (c) silicon, (d) oxygen, and (e) nitrogen.

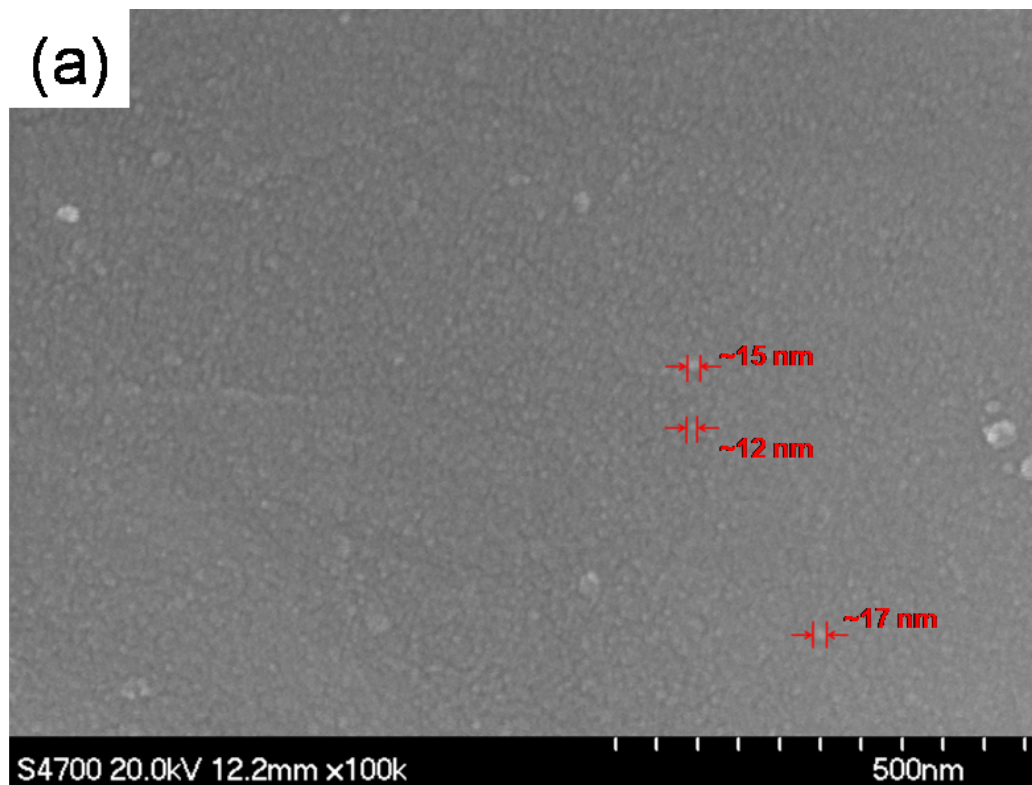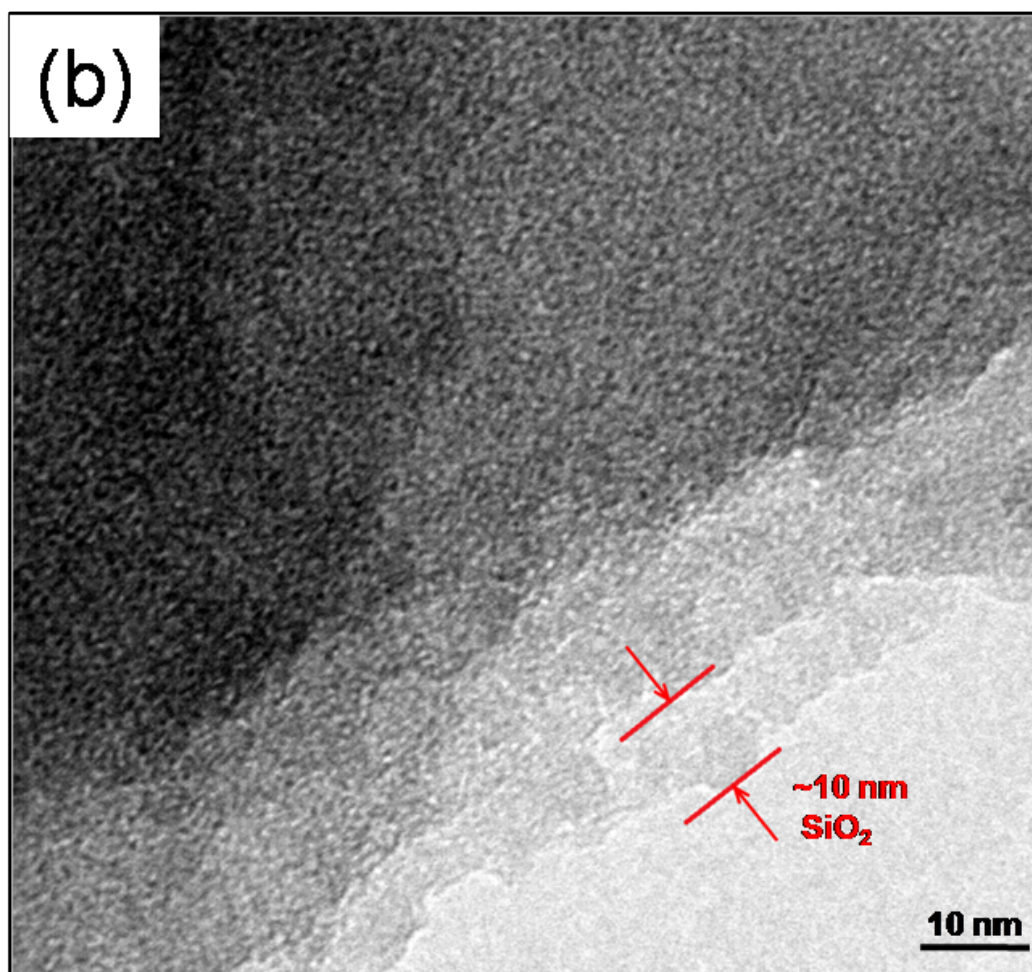

**Fig. S2** (a) SEM and (b) TEM images of S-graphene.

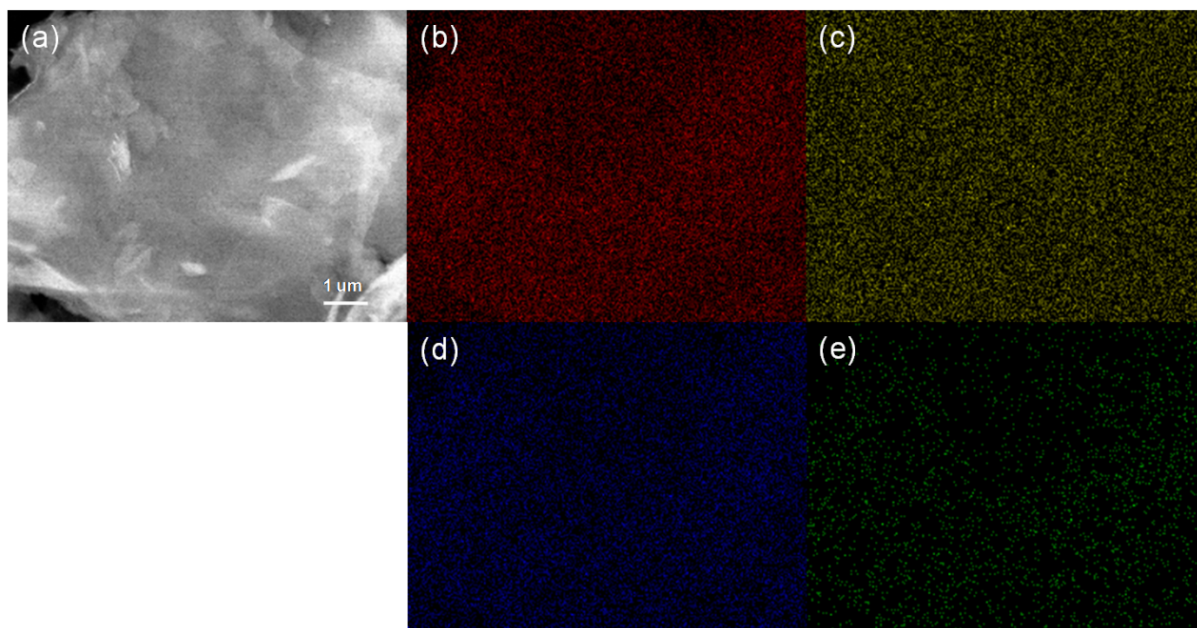

**Fig. S3** (a) SEM image of S-graphene and its corresponding elemental mapping images of (b) carbon, (c) silicon, (d) oxygen, and (e) nitrogen.
